# Supplementary material for: Predicting the potential global distribution of an invasive alien pest Trioza erytreae (Del Guercio) (Hemiptera: Triozidae)
Source: Research Square preprint supplement (doi:10.21203/rs.3.rs-1341844/v1), 2022-04-18
Supplement: Supplementary file 1 [file 5eabef5055b35324fa354033.xlsx]

## Sheet: Sheet1
Predicting the potential global distribution of an invasive alien pest Trioza erytreae (Del Guercio) (Hemiptera: Triozidae).
Owusu Fordjour Aidoo1*, Philipe Guilherme Corcino Souza2, Ricardo Siqueira da Silva3, Paulo Antonio Santana Júnior2, Marcelo Coutinho Picanço2, Rosina Kyerematen4, Mamoudou Sètamou5, Sunday Ekesi6, Christian Borgemeister7.
1Department of Biological, Physical and Mathematical Sciences, School of Natural and Environmental Sciences (SNES), University of Environment and Sustainable Development (UESD), PMB, Somanya, E/R, Ghana.
2Department of Agronomy, Universidade Federal dos Vales do Jequitinhonha e Mucuri (UFVJM), Diamantina, MG, 39100-000, Brazil.
3Department of Entomology, Universidade Federal de Viçosa, Av. P. H. Rolfs, s/n, Viçosa, MG, 36570-900, Brazil.
4Department of Animal Biology and Conservation Sciences (DABCS), University of Ghana, P.O. Box LG 67, Legon - Accra, Ghana.
5Citrus Center, Texas A & M University-Kingsville, 312 N. International Blvd., Weslaco, TX 78599, USA.
6Plant Health Theme. International Centre of Insect Physiology and Ecology (icipe), P.O. Box 30772-00100 Nairobi, Kenya
7Centre for Development Research (ZEF), University of Bonn, Genscherallee 3, 53113 Bonn, Germany.
*Corresponding author; email: ofaidoo@uesd.edu.gh, phone: +233545636332
Trioza erytreae	Latitude	Longitude	elevation
Trioza erytreae	-0.0835556	37.839	940
Trioza erytreae	-0.107417	37.7672	1055
Trioza erytreae	-0.134861	37.8385	792
Trioza erytreae	-0.16686	35.2139	1307
Trioza erytreae	-0.202694	35.2043	1435
Trioza erytreae	-0.203417	35.5888	2216
Trioza erytreae	-0.279167	35.2833	1843
Trioza erytreae	-0.310556	35.2294	1935
Trioza erytreae	-25.3766	30.5425	970
Trioza erytreae	0.689167	34.3119	1243
Trioza erytreae	-0.339722	38.0831	619
Trioza erytreae	-0.340833	36.9003	1953
Trioza erytreae	-0.373333	35.2611	1976
Trioza erytreae	-0.423056	35.1636	1741
Trioza erytreae	-0.440556	35.8119	2935
Trioza erytreae	-0.462722	37.0909	1767
Trioza erytreae	-0.485278	34.8564	1528
Trioza erytreae	-0.5165	37.5111	1349
Trioza erytreae	-0.524167	38.0014	1640
Trioza erytreae	-0.529444	34.775	1560
Trioza erytreae	-0.546694	37.585	1218
Trioza erytreae	-0.547139	37.5862	1211
Trioza erytreae	-0.547722	37.5878	1199
Trioza erytreae	-0.551389	35.1019	1721
Trioza erytreae	-0.620556	38.8278	469
Trioza erytreae	-0.623889	34.2881	1188
Trioza erytreae	-0.636111	35.3383	2036
Trioza erytreae	-0.646944	34.6961	1618
Trioza erytreae	-0.681667	34.5067	1330
Trioza erytreae	-0.683889	34.2931	1515
Trioza erytreae	-0.689167	34.3119	1489
Trioza erytreae	-0.832222	34.4758	1368
Trioza erytreae	-0.860778	37.1304	1382
Trioza erytreae	-0.863056	37.1373	1390
Trioza erytreae	-1.07896	37.8808	1150
Trioza erytreae	-1.31556	37.4081	1631
Trioza erytreae	-1.32139	36.9989	1586
Trioza erytreae	-1.32972	37.5856	1076
Trioza erytreae	-1.44861	37.9992	1047
Trioza erytreae	-1.46389	38.1953	611
Trioza erytreae	-1.60944	38.1631	860
Trioza erytreae	-6.84406	37.6625	539
Trioza erytreae	-6.85489	37.6768	663
Trioza erytreae	-6.91286	37.5718	552
Trioza erytreae	-6.997	37.5721	785
Trioza erytreae	-7.05939	37.5833	1229
Trioza erytreae	-7.00269	37.5705	812
Trioza erytreae	-6.98617	37.5611	651
Trioza erytreae	-5.10106	38.6494	486
Trioza erytreae	-5.10092	38.6337	898
Trioza erytreae	-5.10111	38.6657	410
Trioza erytreae	-8.96556	39.4969	16
Trioza erytreae	-5.09972	38.6331	906
Trioza erytreae	-6.23111	35.5703	1034
Trioza erytreae	-6.91111	37.5708	549
Trioza erytreae	-6.99	37.5814	989
Trioza erytreae	-7.04194	37.5731	1034
Trioza erytreae	-6.28333	36.75	1265
Trioza erytreae	-7.04139	37.5647	1189
Trioza erytreae	11.2572	36.8411	2122
Trioza erytreae	11.27	36.8569	2110
Trioza erytreae	10.7061	37.0664	2067
Trioza erytreae	8.20278	38.0694	2544
Trioza erytreae	8.95722	37.9314	2369
Trioza erytreae	11.5761	37.3617	1805
Trioza erytreae	12.1228	37.7872	1989
Trioza erytreae	1.07797	34.0011	1144
Trioza erytreae	1.10164	34.0071	1154
Trioza erytreae	1.09978	34.0034	1155
Trioza erytreae	1.692	34.9827	1262
Trioza erytreae	1.69092	34.9898	1245
Trioza erytreae	1.71008	33.9559	1093
Trioza erytreae	1.13222	34.0444	1134
Trioza erytreae	1.7125	33.9577	1098
Trioza erytreae	1.71936	33.9641	1085
Trioza erytreae	1.77814	33.9572	1092
Trioza erytreae	1.13222	33.9572	1138
Trioza erytreae	-10.1616	15.173	1163
Trioza erytreae	41.5103	-8.77361	7
Trioza erytreae	41.4931	-8.70194	20
Trioza erytreae	41.4519	-8.75361	25
Trioza erytreae	41.4275	-8.75611	29
Trioza erytreae	41.4308	-8.7625	24
Trioza erytreae	41.4228	-8.74944	38
Trioza erytreae	41.4053	-8.75444	25
Trioza erytreae	41.4053	-8.65917	54
Trioza erytreae	41.3572	-8.74111	19
Trioza erytreae	41.2639	-8.65806	69
Trioza erytreae	41.3156	-8.72056	30
Trioza erytreae	41.1583	-8.62889	84
Trioza erytreae	40.8794	-8.60778	38
Trioza erytreae	40.6406	-8.65389	8
Trioza erytreae	40.5989	-8.60278	50
Trioza erytreae	40.5947	-8.73861	4
Trioza erytreae	40.5786	-8.74389	12
Trioza erytreae	40.6003	-8.72389	7
Trioza erytreae	40.5489	-8.7575	7
Trioza erytreae	40.4867	-8.73528	23
Trioza erytreae	40.5767	-8.74444	4
Trioza erytreae	40.4808	-8.78278	5
Trioza erytreae	40.4397	-8.78972	10
Trioza erytreae	40.4286	-8.73806	31
Trioza erytreae	40.4469	-8.07333	245
Trioza erytreae	40.3833	-8.67806	55
Trioza erytreae	40.4747	-8.68306	57
Trioza erytreae	40.1661	8.75389	396
Trioza erytreae	42.5814	-8.12944	612
Trioza erytreae	43.2725	-8.13083	321
Trioza erytreae	42.1344	-8.61278	57
Trioza erytreae	38.6767	-9.16556	75
Trioza erytreae	39.5683	3.205	81
Trioza erytreae	39.6103	2.65139	56
Trioza erytreae	39.9122	3.07528	12
Trioza erytreae	-23.385	29.4036	1018
Trioza erytreae	-25.4753	30.9694	674
Trioza erytreae	-25.515	31.0106	884
Trioza erytreae	-25.6097	27.7958	1128
Trioza erytreae	-34.2306	19.4247	245
Trioza erytreae	-34.2472	19.4436	302
Trioza erytreae	-25.1744	29.4033	921
Trioza erytreae	-25.1597	29.3847	931
Trioza erytreae	-24.3558	30.95	532
Trioza erytreae	-33.7842	20.1189	256
Trioza erytreae	-25.4747	30.9697	672
Trioza erytreae	-25.5211	31.0119	937
Trioza erytreae	-25.8006	31.4056	445
Trioza erytreae	-33.9314	18.8597	111
Trioza erytreae	-33.9789	18.8436	130
Trioza erytreae	-34.0056	18.7978	108
Trioza erytreae	-34.0225	20.4464	129
Trioza erytreae	-23.83	30.1428	766
Trioza erytreae	-33.64	19.0092	123
Trioza erytreae	-25.3286	31.0189	924
Trioza erytreae	-25.3794	30.9819	836
Trioza erytreae	-24.3083	29.2664	1146
Trioza erytreae	-1.49944	13.5289	360
Trioza erytreae	-13.9811	33.6369	1156
Trioza erytreae	-15.6672	34.9367	715
Trioza erytreae	-13.9817	33.6664	1122
Trioza erytreae	-15.8258	35.0303	1142
Trioza erytreae	-1.9	29.785	1549
Trioza erytreae	-3.49222	29.4569	1861
Trioza erytreae	-22.6628	14.5381	22
Trioza erytreae	-19.5719	18.1067	1443
Trioza erytreae	-2.78333	29.2331	1626
Trioza erytreae	-2.93694	11.9861	224
Trioza erytreae	3.97194	11.5983	656
Trioza erytreae	3.85639	11.5003	746
Trioza erytreae	-1.56833	31.6989	1298
Trioza erytreae	-1.5575	31.7122	1229
Trioza erytreae	-1.40333	31.7831	1331
Trioza erytreae	-1.40333	31.6008	1153
Trioza erytreae	-7.04333	37.6192	1486
Trioza erytreae	-6.15333	35.7578	1126
Trioza erytreae	-6.28806	36.7497	1284
Trioza erytreae	-6.79611	37.6292	496
Trioza erytreae	-6.79611	37.6292	547
Trioza erytreae	-6.70833	37.7217	542
Trioza erytreae	-6.70083	37.6392	587
Trioza erytreae	-6.89139	37.5608	539
Trioza erytreae	4.75556	11.2231	496
Trioza erytreae	4.77111	10.8278	878
Trioza erytreae	4.88306	10.7953	696
Trioza erytreae	2.9375	11.9858	656
Trioza erytreae	3.97167	11.5844	665
Trioza erytreae	4.15833	11.5358	541
Trioza erytreae	3.84806	11.5014	707
Trioza erytreae	3.51333	11.5083	641
Trioza erytreae	3.81806	11.4436	744
Trioza erytreae	4.84778	9.81778	520
Trioza erytreae	5.37833	10.4206	1521
Trioza erytreae	5.48389	10.4236	1389
Trioza erytreae	5.50611	10.6333	1047
Trioza erytreae	5.40417	10.3208	1548
Trioza erytreae	7.33778	13.5639	1089
Trioza erytreae	5.44583	10.0469	1330
Trioza erytreae	28.2967	-16.6306	2205
Trioza erytreae	28.7122	-17.9075	1408
Trioza erytreae	27.9211	-15.5489	720
Trioza erytreae	28.1028	-17.2197	959
Trioza erytreae	27.7258	-18.0247	1343
Trioza erytreae	28.0328	-15.6675	1002
Trioza erytreae	27.9486	-15.3875	15
Trioza erytreae	13.5778	44.0181	1340
Trioza erytreae	13.5	44	1140
Trioza erytreae	15.5	47.5	1421
Trioza erytreae	-20.3	57.5	442
Trioza erytreae	-20.3	57.6	382
Trioza erytreae	-17.9	20.6	1054
Trioza erytreae	-14.1	14.6	1489
Trioza erytreae	-9.3	14.9	771
Trioza erytreae	-12.3	17.1	1574
Trioza erytreae	-16	-5.7	285
Trioza erytreae	-20	47	1675
Trioza erytreae	-13.3	34.3	479
Trioza erytreae	-25.4791	30.9928	729
Trioza erytreae	-25.4801	30.9939	725
Trioza erytreae	-25.3845	30.5427	960
Trioza erytreae	-25.4587	31.0463	962
Trioza erytreae	-25.4521	30.9711	668
Trioza erytreae	-25.4728	30.9916	673
Trioza erytreae	-23.9199	30.2329	563
Trioza erytreae	-23.9117	30.2244	599
Trioza erytreae	-23.8874	30.3291	531
Trioza erytreae	-23.9184	30.2332	568
Trioza erytreae	-23.9189	30.2321	570
Trioza erytreae	-23.8911	30.3277	532
Trioza erytreae	-23.8919	30.3292	532
Trioza erytreae	-23.8371	30.1605	734
Trioza erytreae	-25.7478	28.2593	1359
Trioza erytreae	-25.5769	30.9611	1037
Trioza erytreae	-25.4719	30.9958	660
Trioza erytreae	-23.8371	30.1605	733
Trioza erytreae	-25.7522	28.2245	1355
Trioza erytreae	-25.1167	31.0833	830
Trioza erytreae	-25.45	30.9833	605
Trioza erytreae	-24.4167	30.7	677
Trioza erytreae	-25.7478	28.2593	1359
Trioza erytreae	28.0622	-15.575	820
Trioza erytreae	28.4761	-16.3421	660
Trioza erytreae	28.3988	-16.5055	354
Trioza erytreae	28.4929	-16.4159	370
Trioza erytreae	42.2813	-8.82061	8
Trioza erytreae	42.55	-8.75667	62
Trioza erytreae	42.4327	-8.64744	17
Trioza erytreae	42.3901	-8.82914	22
Trioza erytreae	32.6728	-16.8472	646
Trioza erytreae	32.6481	-16.9617	114
Trioza erytreae	32.6771	-17.0562	226
Trioza erytreae	32.8004	-17.0441	82
Trioza erytreae	33.078	-16.3483	90
Trioza erytreae	41.3287	-8.67636	81
Trioza erytreae	40.8825	-8.5295	151
Trioza erytreae	40.069	-8.80717	88
Trioza erytreae	38.7448	-9.13692	93
Trioza erytreae	38.9772	-9.33436	210
Trioza erytreae	39.011	-9.41092	37
Trioza erytreae	38.6499	-9.19036	53
Trioza erytreae	37.7503	-25.6658	56
Trioza erytreae	-12.5	18.5	1355
Trioza erytreae	6	12.5	720
Trioza erytreae	-12.2333	44.4455	1143
Trioza erytreae	-2.5	23.5	441
Trioza erytreae	15	39	1866
Trioza erytreae	-26.5	31.5	540
Trioza erytreae	9	39.5	1720
Trioza erytreae	-1	11.75	319
Trioza erytreae	1	38	697
Trioza erytreae	-20	47	1675
Trioza erytreae	-13.5	34	1177
Trioza erytreae	-20.3	57.5833	432
Trioza erytreae	-21.1	55.6	985
Trioza erytreae	-2	30	1354
Trioza erytreae	-15.95	-5.7	566
Trioza erytreae	-29	24	1037
Trioza erytreae	16	30	265
Trioza erytreae	-6	35	829
Trioza erytreae	1.25	32.5	1094
Trioza erytreae	-14.3333	28.5	1156
Trioza erytreae	-19	29.75	1285
Trioza erytreae	25	45	523
Trioza erytreae	15.5	47.5	1420
Trioza erytreae	39.6945	-8.13057	586
Trioza erytreae	37.8085	-25.4747	258
Trioza erytreae	32.7674	-16.947	1139
Trioza erytreae	40	-4	511
Trioza erytreae	28	-15.5	633
Trioza erytreae	18.2467	42.5086	2220
Trioza erytreae	18.2506	42.6156	2088
Trioza erytreae	18.225	42.7719	2050
Trioza erytreae	18.195	42.5264	2247
Trioza erytreae	18.2508	42.6311	2066
Trioza erytreae	18.3078	42.5953	2048
Trioza erytreae	17.2475	43.1067	1100
Trioza erytreae	17.2317	43.0803	1220
Trioza erytreae	17.2822	43.1392	880
Trioza erytreae	17.2692	43.0825	700
Trioza erytreae	17.2633	43.1339	1150
Trioza erytreae	17.5656	44.2272	1281
Trioza erytreae	17.5072	44.2072	1278
Trioza erytreae	17.4822	44.1047	1321
Trioza erytreae	25.6864	39.2919	758
Trioza erytreae	25.6547	39.2972	754
Trioza erytreae	25.7133	39.2739	742
Trioza erytreae	13.5772	44.0172	1339
Trioza erytreae	13.9769	45.5822	2034
Trioza erytreae	13.9889	45.5769	2004
Trioza erytreae	13.9981	45.5628	1984
Trioza erytreae	13.9736	45.5683	2013
Trioza erytreae	13.9861	45.5708	1995
Trioza erytreae	13.9422	45.6783	2170
Trioza erytreae	13.9428	45.6964	2179
Trioza erytreae	13.9431	45.6642	2162
Trioza erytreae	16.7781	43.4336	2108
Trioza erytreae	16.7683	43.4267	2123
Trioza erytreae	16.7808	43.4258	2140
Trioza erytreae	14.9069	45.585	1559
Trioza erytreae	15.4319	45.3006	1105
Trioza erytreae	15.3711	44.1903	2261
Trioza erytreae	15.2753	44.2561	2307
Trioza erytreae	15.5056	44.2247	2182
